# Supplementary material for: Tricolour luminescence in an Au(i) complex controlled by polymorphism and mechanical stress
Source: Royal Society of Chemistry journal article supplement (doi:10.1039/d4ma00314d), 2024-01-01
Supplement: d4ma00314d1.pdf [file d4ma00314d1.pdf]

*Electronic Supplementary Information for:*

**Tricolour Luminescence in Au(I) Complex Controlled by Polymorphism and Mechanical Stress**

Andriani Furoida,<sup>a</sup> Misato Daitani,<sup>a</sup> Kohsuke Matsumoto,<sup>a</sup> Kyohei Hisano,<sup>a,b</sup> and Osamu Tsutsumi<sup>a\*</sup>

<sup>a</sup> *Department of Applied Chemistry, Ritsumeikan University.*

*1-1-1 Nojihigashi, Kusatsu 525-8577, Japan.*

<sup>b</sup> *Present address: Laboratory for Chemistry and Life Science, Institute of Innovative Research,  
Tokyo Institute of Technology, 4259 Nagatsuta, Midori-ku, Yokohama 226-8501, Japan.*

\* Correspondence should be addressed to O. Tsutsumi.

E-mail: [tsutsumi@sk.ritsumeai.ac.jp](mailto:tsutsumi@sk.ritsumeai.ac.jp)

**Table of contents**

|                                |           |
|--------------------------------|-----------|
| 1. NMR characterization        | .....S-3  |
| 2. X-ray crystallography       | .....S-5  |
| 3. Thermal properties          | .....S-7  |
| 4. Photophysical properties    | .....S-11 |
| 5. Powder XRD analysis         | .....S-12 |
| 6. TD-DFT calculation          | .....S-14 |
| 7. Mechanochromic luminescence | .....S-15 |
| 8. Luminescence in LC phase    | .....S-19 |
| 9. References                  | .....S-20 |

### 1. NMR characterization

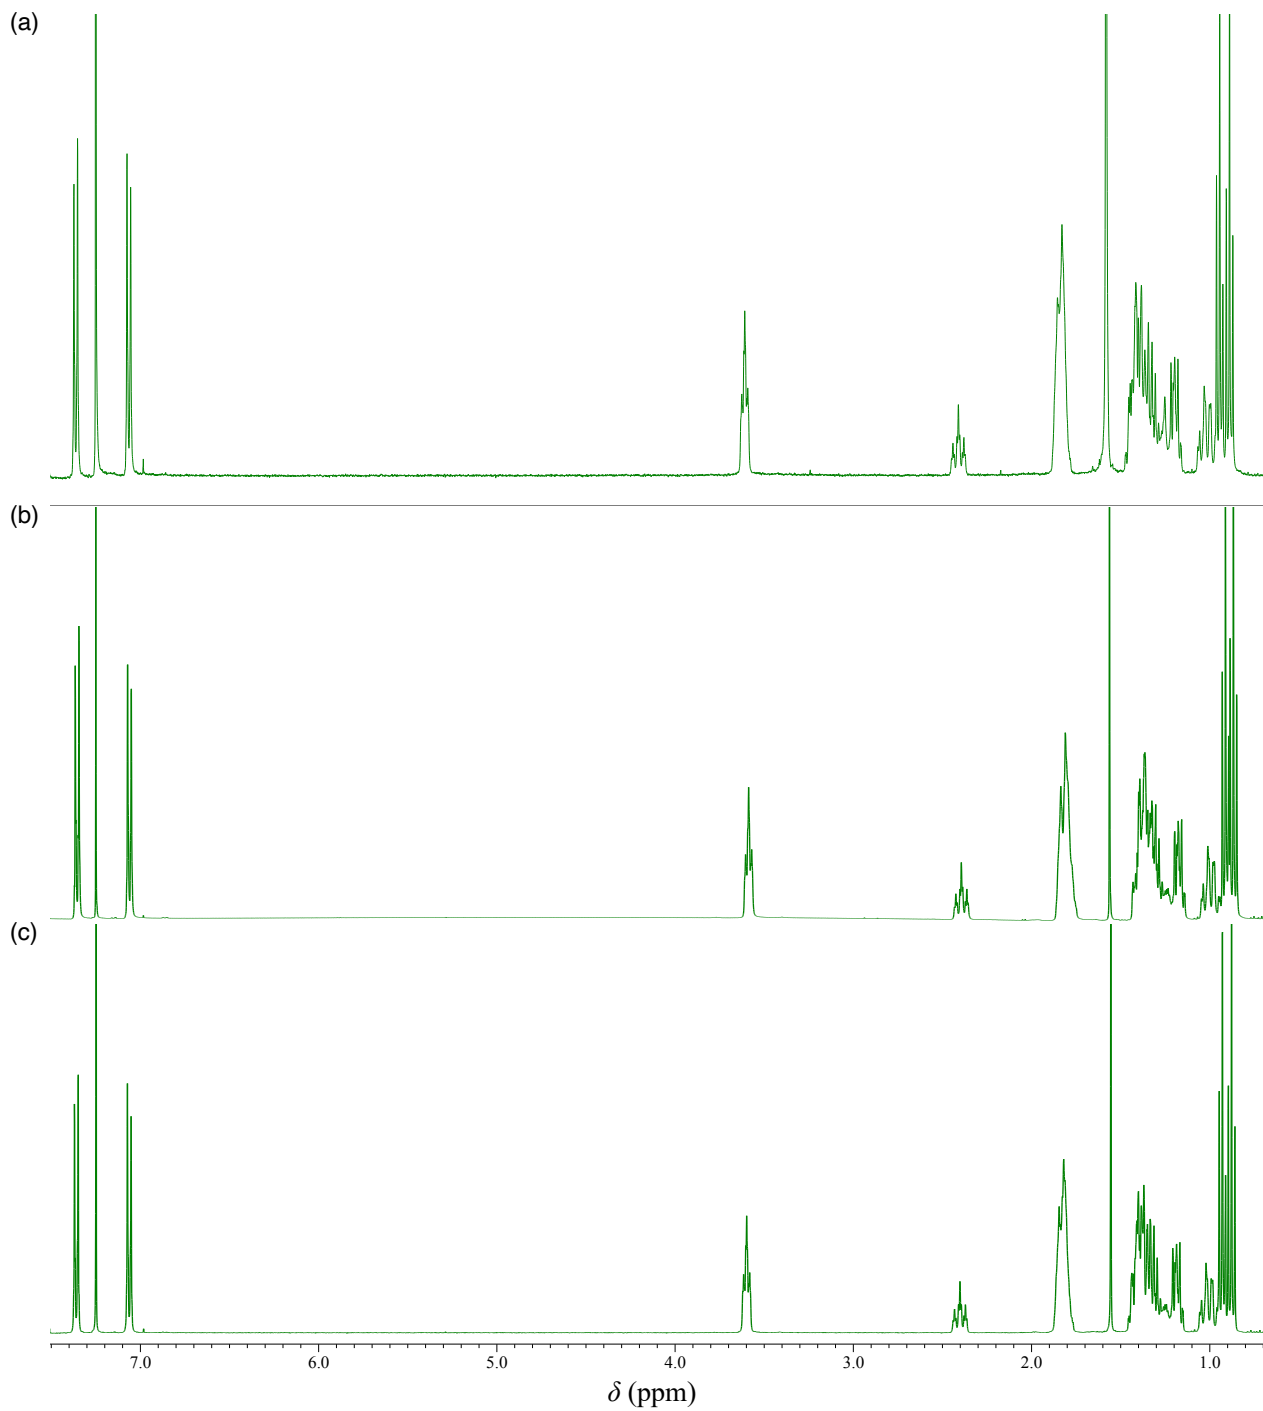

**Fig. S1**  $^1\text{H}$  NMR spectra of CP polymorphs in  $\text{CDCl}_3$  solution: (a) CP-B, (b) CP-G, (c) CP-Y.

1.03

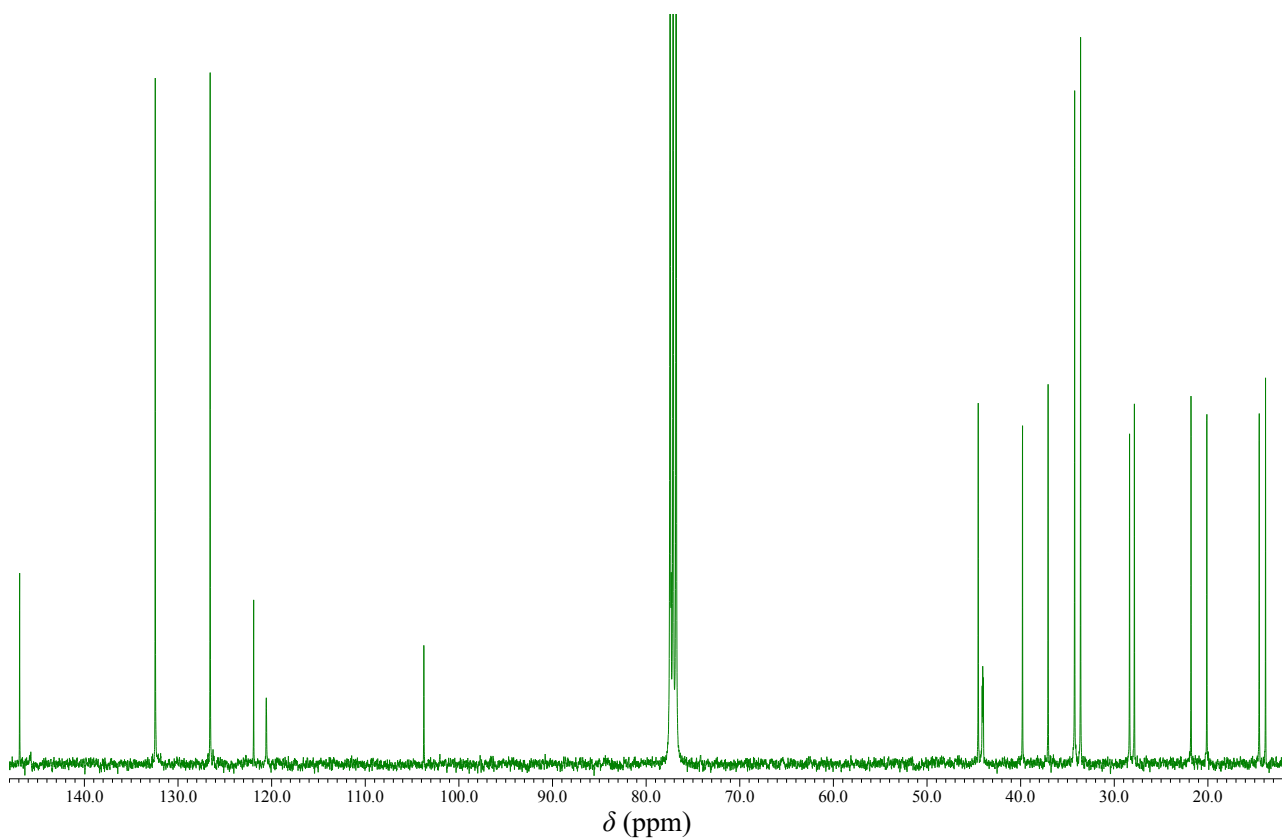

**Fig. S2**  $^{13}\text{C}$  NMR spectrum of CP in  $\text{CDCl}_3$ .

## 2. X-Ray Crystallography

Single crystals were obtained by slow evaporation from a mixed solvent system of dichloromethane as good solvent and hexane or ethyl acetate as poor solvent. The X-ray diffraction measurement was carried out at room temperature (293 K). The crystal packing of CP polymorphs is shown in Fig. S3 with the crystal data disclosed in Table S1 have been indexed, and are included in the Cambridge Crystallographic Center (CCDC) database with the following reference numbers: CCDC 2327717 (CP-B), CCDC 2327718 (CP-G), and CCDC 2327741 (CP-Y). The indexed database contains additional supplementary crystallographic data for this paper and may be accessed without charge at <http://www.ccdc.cam.ac.uk/conts/retrieving.html>.

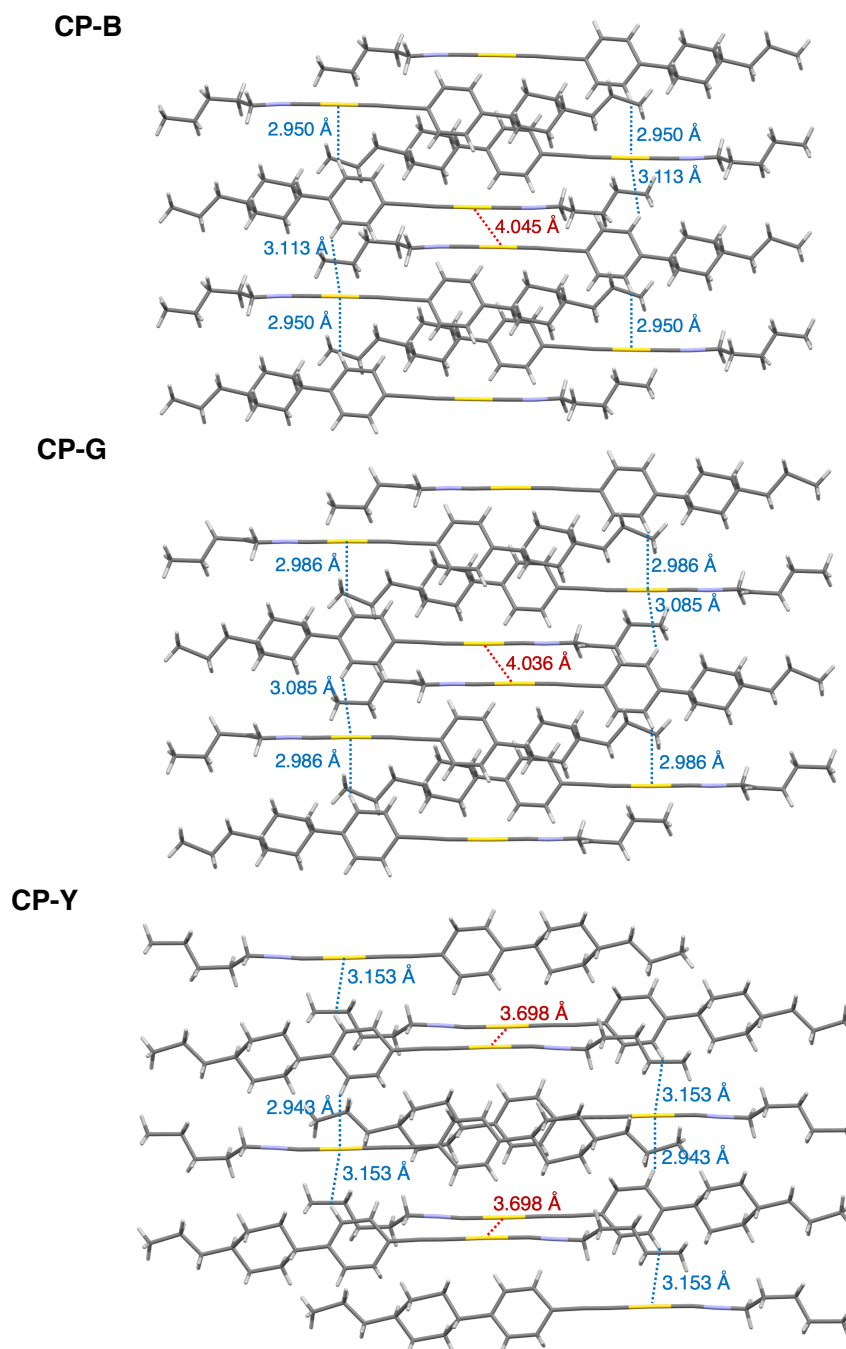

**Fig. S3** Crystal packing structures of CP at room temperature. Color legend: grey, C; white, H; blue, N; yellow, Au. Intermolecular Au–Au and CH–Au interactions are indicated with red and blue dashed lines, respectively.



**Table S1.** Crystallographic data of CP crystal polymorphs.

|                                                                  | <b>CP-B</b>                         | <b>CP-G</b>                         | <b>CP-Y</b>                         |
|------------------------------------------------------------------|-------------------------------------|-------------------------------------|-------------------------------------|
| Empirical Formula                                                | C <sub>23</sub> H <sub>32</sub> AuN | C <sub>23</sub> H <sub>32</sub> AuN | C <sub>23</sub> H <sub>32</sub> AuN |
| Formula Weight                                                   | 519.484                             | 519.484                             | 519.484                             |
| Temperature (K)                                                  | 293 K                               | 293 K                               | 293 K                               |
| Crystal Colour / Habit                                           | colourless, plate                   | colourless, plate                   | colourless, plate                   |
| Crystal Size (mm)                                                | 0.6 × 0.5 × 0.3                     | 0.7 × 0.5 × 0.3                     | 0.6 × 0.5 × 0.2                     |
| Crystal System                                                   | triclinic                           | triclinic                           | triclinic                           |
| Space group                                                      | <i>P</i> -1                         | <i>P</i> -1                         | <i>P</i> -1                         |
| <i>a</i> (Å)                                                     | 9.197 (9)                           | 9.210 (2)                           | 9.196 (3)                           |
| <i>b</i> (Å)                                                     | 9.965 (10)                          | 9.984 (3)                           | 9.937 (4)                           |
| <i>c</i> (Å)                                                     | 13.627 (14)                         | 13.584 (3)                          | 13.588 (5)                          |
| $\alpha$ (°)                                                     | 68.895 (4)                          | 68.792 (10)                         | 68.902 (12)                         |
| $\beta$ (°)                                                      | 89.895 (4)                          | 89.793 (9)                          | 89.871 (11)                         |
| $\gamma$ (°)                                                     | 72.389 (3)                          | 72.379 (7)                          | 72.413 (11)                         |
| <i>V</i> (Å <sup>3</sup> )                                       | 1102.4 (2)                          | 1101.9 (5)                          | 1096.4 (7)                          |
| <i>Z</i>                                                         | 2                                   | 2                                   | 2                                   |
| <i>R</i> [ <i>F</i> <sup>2</sup> > 2σ ( <i>F</i> <sup>2</sup> )] | 0.0476                              | 0.1054                              | 0.0742                              |
| <i>wR</i> ( <i>F</i> <sup>2</sup> )                              | 0.2047                              | 0.3512                              | 0.2076                              |

**CheckCIF reports**

CheckCIF reports indicate several level A alerts, primarily stemming from the quality of single crystals. Despite our significant efforts to enhance crystal quality, obtaining higher quality crystals for **CP-G** and **CP-Y** remains challenging because those are not the thermodynamically most stable crystal structure. As a result, the reported results represent the best achievable outcome at present. The explanations for each alert are as follows:

**CheckCIF report for CP-G dataset:**

1. **PLAT029\_ALERT\_3\_A:** The crystal exhibited poor diffraction quality due to the poor crystal quality, leading to low data completeness. Despite our efforts to enhance crystal quality, this represents the best achievable result.
2. **PLAT234\_ALERT\_4\_A:** A notable Hirshfeld difference in the C–C bond may be attributed to conformational flexibility and partial disorder of the alkyl chain, compounded by limitations in data quality. While measuring diffraction at low temperature could potentially mitigate conformational flexibility and partial disorder, it is essential to maintain consistency in measurement conditions to observe the crystal structure associated with the luminescence behaviour accurately.
3. **PLAT721\_ALERT\_1\_A:** Deviations in bond lengths may be attributed to data quality limitations, affecting the precise localization of hydrogen atoms.

**CheckCIF report for CP-Y dataset:**

1. **PLAT029\_ALERT\_3\_A:** The crystal exhibited poor diffraction quality, resulting in low data completeness. Despite our efforts to improve crystal quality, this represents the best achievable result.
2. **PLAT234\_ALERT\_4\_A:** Notable Hirshfeld differences in the N–C and C–C bonds may be attributed to conformational flexibility and partial disorder of the alkyl chain, compounded by limitations in data quality. While measuring diffraction at low temperature could potentially mitigate conformational flexibility and partial disorder, it is essential to maintain consistency in measurement conditions to observe the crystal structure associated with the luminescence behaviour accurately.
3. **PLAT721\_ALERT\_1\_A:** Observed deviations in bond lengths and angles may be attributed to limitations in data quality, impacting the precise localization of hydrogen atoms.

### 3. Thermal properties

Thermal stability of CP was evaluated by thermogravimetric analysis (TGA; Shimadzu, DTG-60AH) under N<sub>2</sub> atmosphere at a heating rate of 5.0 °C min<sup>-1</sup> in the range of 25–600 °C. (Fig. S4). The phase transition behavior was observed using differential scanning calorimetry (DSC) (X-DSC7000, SII) at a scanning rate of 1 °C min<sup>-1</sup> (Figs. S5–S6).

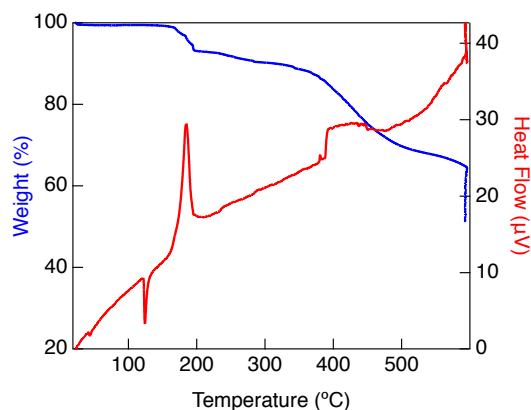

**Fig. S4** TG-DTA thermograms of CP under N<sub>2</sub> atmosphere. Heating rate was 5.0 °C min<sup>-1</sup>.

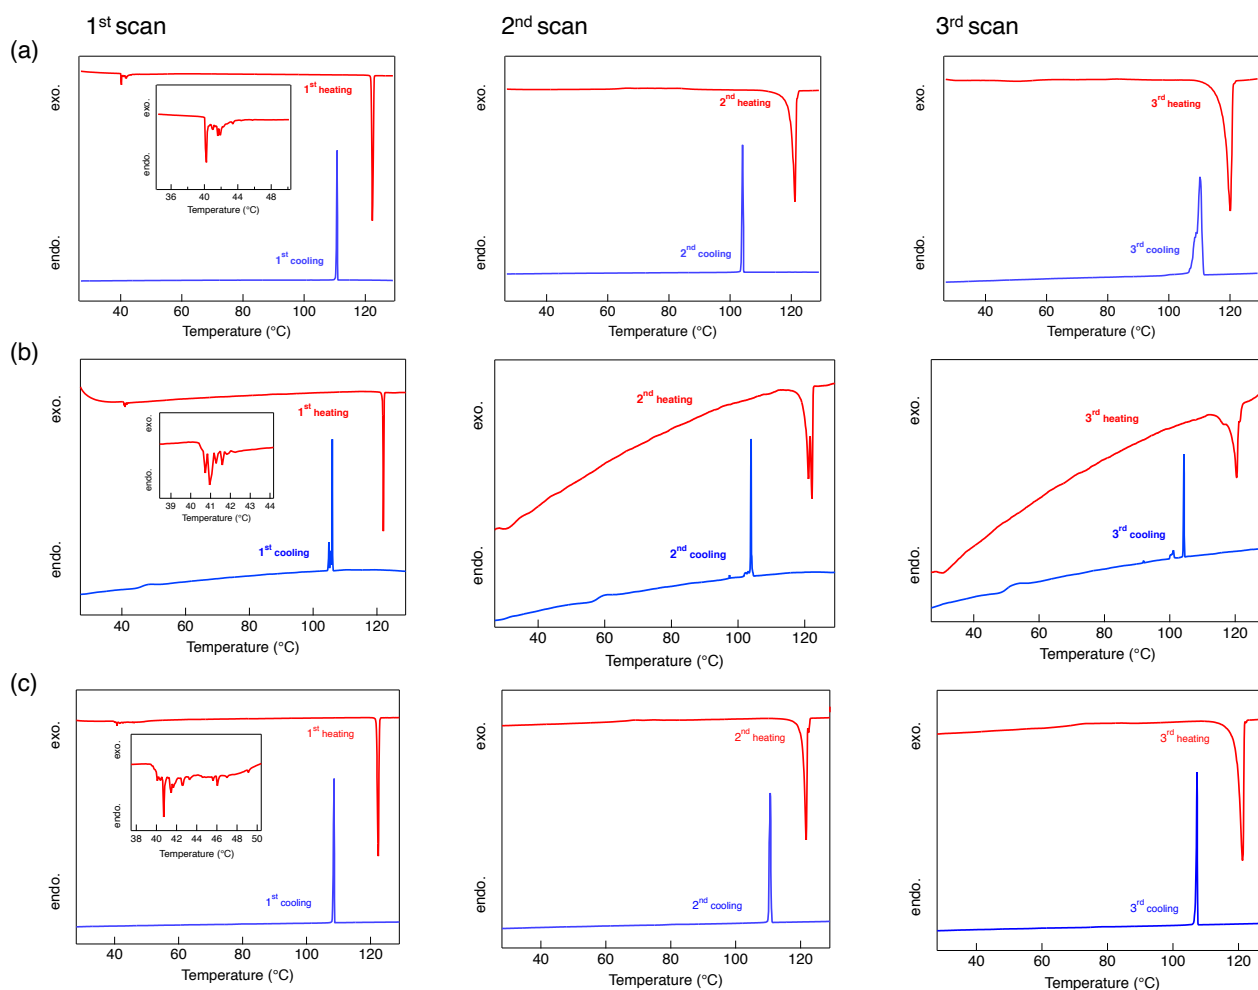

**Fig. S5** DSC thermograms of (a) CP-B, (b) CP-G, and (c) CP-Y in the first, second, and third scan (scanning rate: 1 °C min<sup>-1</sup>; red, heating; blue, cooling).

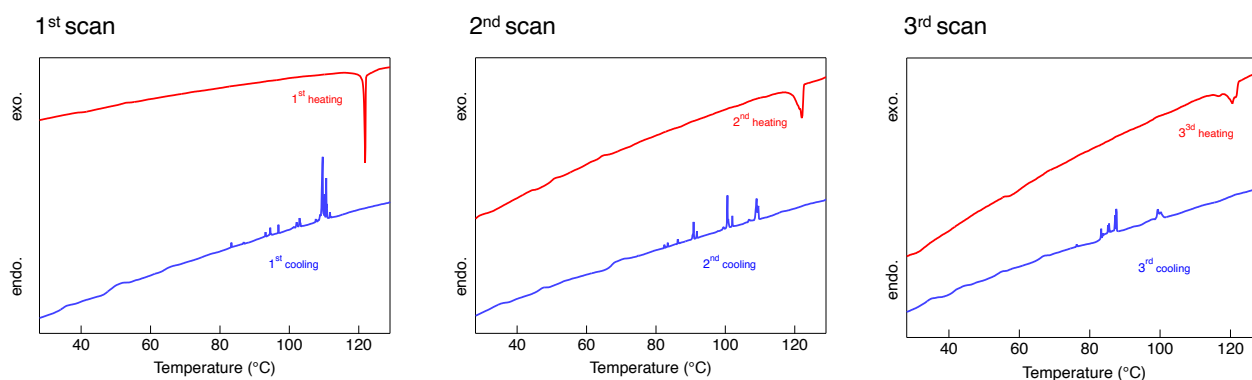

**Fig. S6** DSC thermograms of  $\text{CP}_{\text{ground}}$  in the first, second and third scan (scanning rate:  $1\text{ }^{\circ}\text{C min}^{-1}$ ; red: heating, blue: cooling).

**Table S2.** Thermal properties of CP crystal polymorphs.

|                            |         | Phase sequences ( $^{\circ}\text{C}$ ) <sup>a,b</sup> | $T_{\text{dec}}$ ( $^{\circ}\text{C}$ ) <sup>c</sup> |
|----------------------------|---------|-------------------------------------------------------|------------------------------------------------------|
| <b>CP-B</b>                | Heating | Cr <sub>1</sub> 40 Cr <sub>2</sub> 122 N              | 186                                                  |
|                            | Cooling | Cr <sub>2</sub> 110 N                                 |                                                      |
| <b>CP-G</b>                | Heating | Cr <sub>1</sub> 40 Cr <sub>2</sub> 122 N              |                                                      |
|                            | Cooling | Cr <sub>2</sub> 106 N                                 |                                                      |
| <b>CP-Y</b>                | Heating | Cr <sub>1</sub> 40 Cr <sub>2</sub> 122 N              |                                                      |
|                            | Cooling | Cr <sub>2</sub> 108 N                                 |                                                      |
| <b>CP<sub>ground</sub></b> | Heating | Cr <sub>1</sub> 121 N                                 |                                                      |
|                            | Cooling | Cr <sub>x</sub> 110 N                                 |                                                      |

<sup>a</sup> Abbreviations: Cr, crystalline; N, nematic. <sup>b</sup> The phase transition temperature was determined by DSC as the peak onset. <sup>c</sup> Thermal decomposition temperature was determined by TGA at a heating rate of  $5.0\text{ }^{\circ}\text{C min}^{-1}$ .

## 4. Photophysical properties

### Luminescence properties in degassed solution

The sample solutions ( $1.5 \times 10^{-6}$  and  $1 \times 10^{-5}$  mol L<sup>-1</sup>) in THF ( $f_w = 0\%$ ) and water/THF mixed solvent ( $f_w = 80\%$ ) were prepared and put into a sealed cell. The capillary was inserted into the cell and the argon gas was slowly bubbled into the solution for 15–20 minutes. After degassing, the capillary was removed, and the cell should be kept in a close system when measuring photoluminescence.

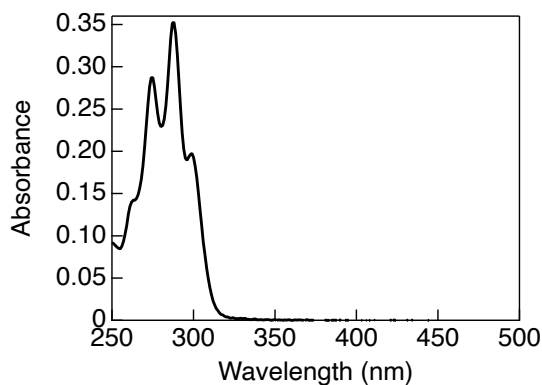

**Fig. S7** Absorption spectrum of CP in THF ( $[CP] = 1 \times 10^{-5}$  mol L<sup>-1</sup>).

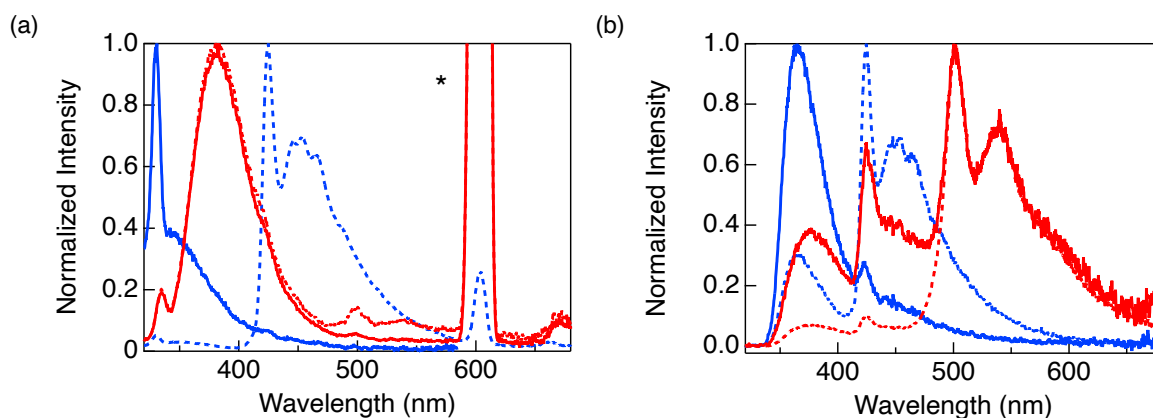

**Fig. S8** Luminescence spectra of CP in THF/water mixtures with  $f_w = 0\%$  (blue) and  $80\%$  (red) under different CP concentrations: (a)  $[CP] = 1.5 \times 10^{-6}$  mol L<sup>-1</sup>, (b)  $[CP] = 1 \times 10^{-5}$  mol L<sup>-1</sup>. Solid lines represent spectra before Ar bubbling, while dashed lines represent spectra after Ar bubbling.  $\lambda_{ex} = 300$  nm. \* denotes the second-order diffraction of the excitation light.

### Photoluminescence lifetime in degassed solution

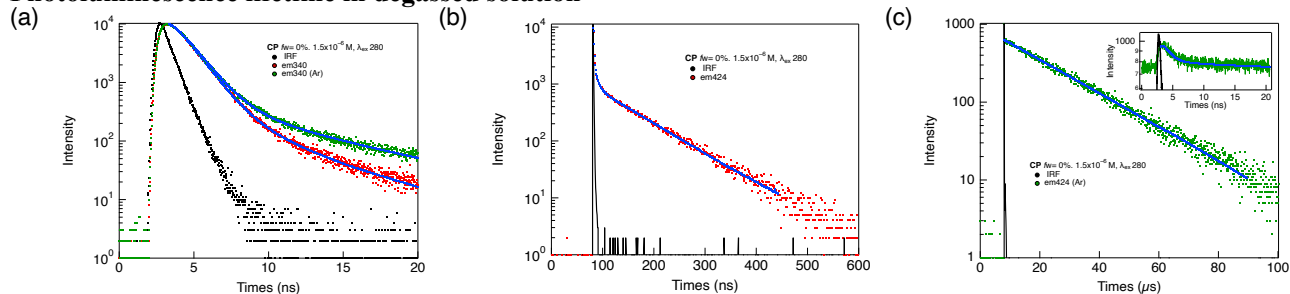

**Fig. S9** Luminescence decay profiles of CP in THF without water before and after Ar bubbling ( $[CP] = 1.5 \times 10^{-6}$  mol L<sup>-1</sup>,  $\lambda_{ex} = 280$  nm): red, observed decay before bubbling; green, observed decay after Ar bubbling; blue, fitting curve; black, instrument response function. (a) monitored at 340 nm (band I), (b) monitored at 424 nm (band II) under ambient air, (c) monitored at 424 nm (band II) after Ar bubbling.

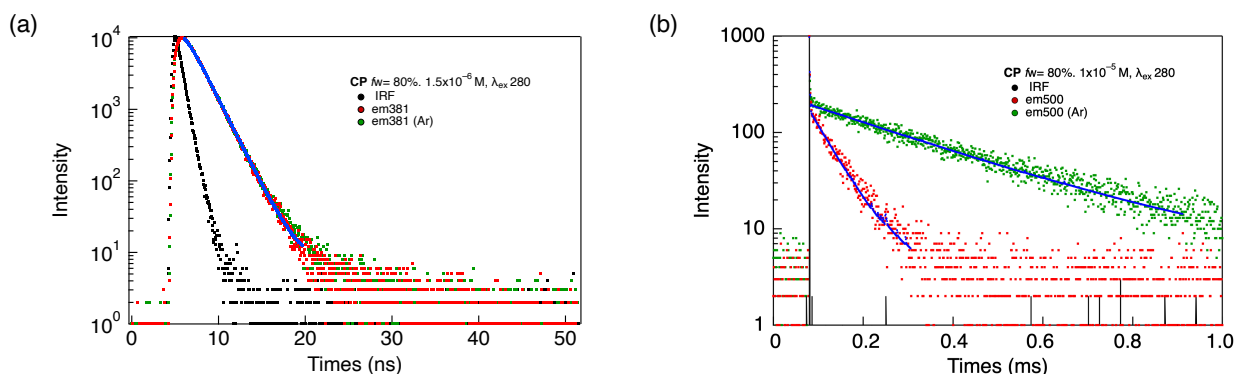

**Fig. S10** Luminescence decay profiles of CP in THF/water mixture ( $f_w = 80\%$ ) before and after Ar bubbling ( $[CP] = 1.5 \times 10^{-6} \text{ mol L}^{-1}$  for (a) and  $1 \times 10^{-5} \text{ mol L}^{-1}$  for (b),  $\lambda_{\text{ex}} = 280 \text{ nm}$ ): red, observed decay before bubbling; green, observed decay after Ar bubbling; blue, fitting curve; black, instrument response function. (a) monitored at 381 nm, (b) monitored at 500 nm.

**Table S3.** Luminescence lifetime of CP in THF/water mixed solvent.<sup>a</sup>

| $f_w$ | $\lambda_{\text{obs}}$ (nm), luminescence band | $\tau$                  | Ar bubbling |
|-------|------------------------------------------------|-------------------------|-------------|
| 0%    | 340, band I                                    | ~1 ns (98%)             | No          |
|       |                                                | 4 ns (2%)               |             |
|       |                                                | ~1 ns (97%)             | Yes         |
|       | 424, band II                                   | 7 ns (3%)               |             |
|       |                                                | ~1 ns (90%)             | No          |
|       |                                                | 6 ns (6%)               |             |
| 80%   | 381, band I                                    | 80 ns (4%)              |             |
|       |                                                | ~1 ns (1%)              | Yes         |
|       |                                                | 17 $\mu\text{s}$ (99%)  |             |
|       | 500, band III                                  | ~1 ns                   | No          |
|       |                                                | ~1 ns                   | Yes         |
|       |                                                | 0.5 $\mu\text{s}$ (94%) | No          |
|       |                                                | 49 $\mu\text{s}$ (6%)   |             |
|       |                                                | 0.6 $\mu\text{s}$ (95%) | Yes         |
|       |                                                | 271 $\mu\text{s}$ (5%)  |             |

<sup>a</sup> Abbreviations:  $f_w$ , volume fraction of water in the mixed solvent;  $\lambda_{\text{obs}}$ , observation wavelength for luminescence decay;  $\tau$ , luminescent lifetime.  $\lambda_{\text{ex}} = 280 \text{ nm}$  for all measurements.

### Photoluminescence of crystal polymorphs at different excitation

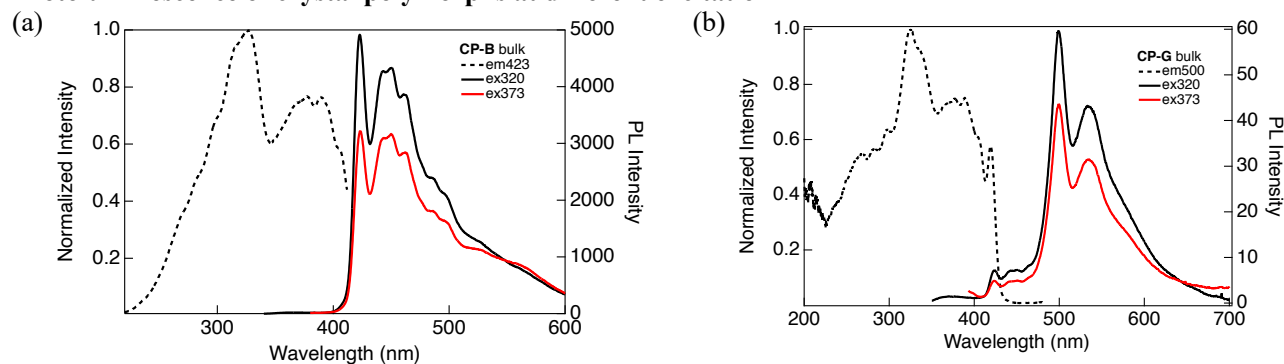

**Fig. S11** Excitation (dashed line) and emission spectra (solid line) of (a) CP-B and (b) CP-G in the bulk crystals at different excitation at room temperature. (black:  $\lambda_{\text{ex}} = 320 \text{ nm}$ ; red:  $\lambda_{\text{ex}} = 373 \text{ nm}$ ).

### Photoluminescence lifetime of crystal polymorphs

Photoluminescence decay profiles of CP crystals were measured by using Quantaaurus-Tau (Hamamatsu),  $\lambda_{\text{ex}} = 340$  nm, frequency; 2 kHz, stop condition; 1000 counts.

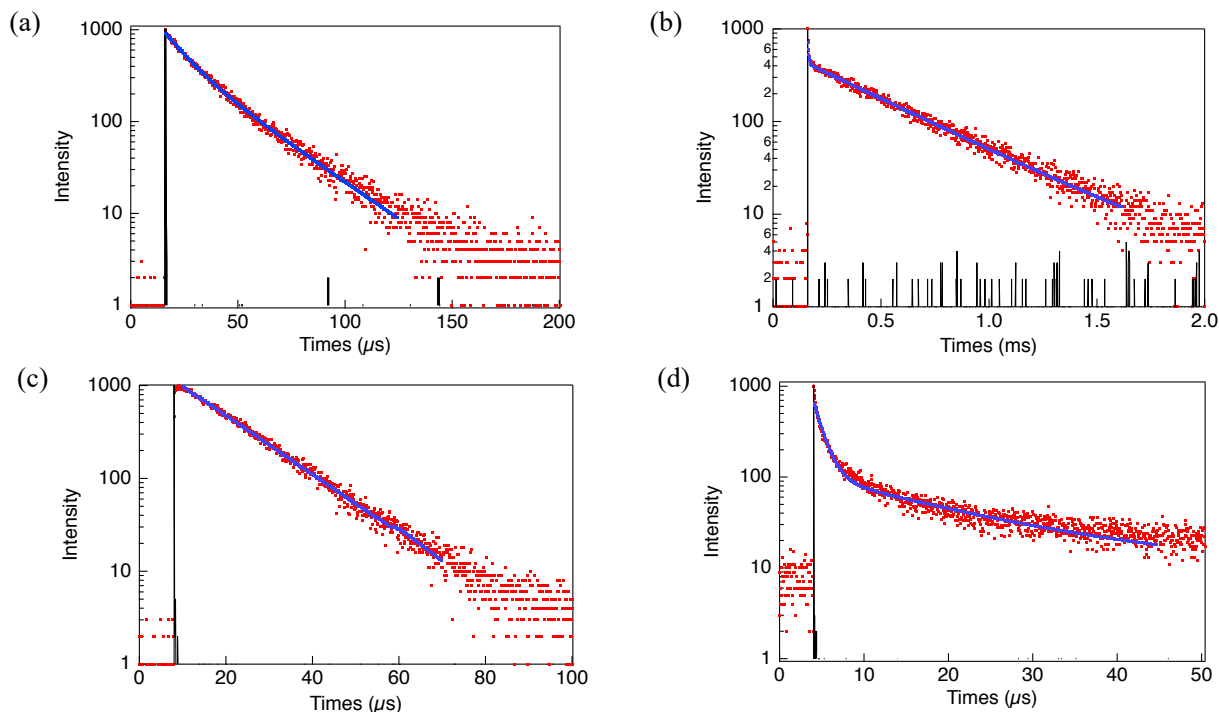

**Fig. S12** Luminescence decay profiles of CP crystals: (a) CP-B at 423 nm, (b) CP-G at 500 nm, (c) CP-Y at 560 nm, and (d) CP<sub>ground</sub> at 500 nm (red, observed decay; blue, fitting curve; black, instrument response function;  $\lambda_{\text{ex}} = 340$  nm).

**Table S4.** Luminescence lifetime of CP in crystals. <sup>a</sup>

|                      | $\lambda_{\text{obs}}$ (nm) | $\tau$ ( $\mu\text{s}$ ) |
|----------------------|-----------------------------|--------------------------|
| CP-B                 | 423                         | 11 (50%); 27 (50%)       |
| CP-G                 | 500                         | 4 (52%); 389 (48%)       |
| CP-Y                 | 560                         | 13                       |
| CP <sub>ground</sub> | 500                         | 1 (86%); 16 (14%)        |

<sup>a</sup> Abbreviations:  $\lambda_{\text{obs}}$ , observation wavelength for luminescence decay.  $\tau$ , luminescent lifetime.  $\lambda_{\text{ex}} = 340$  nm for all measurements.

### Luminescence of crystal polymorphs at low temperature

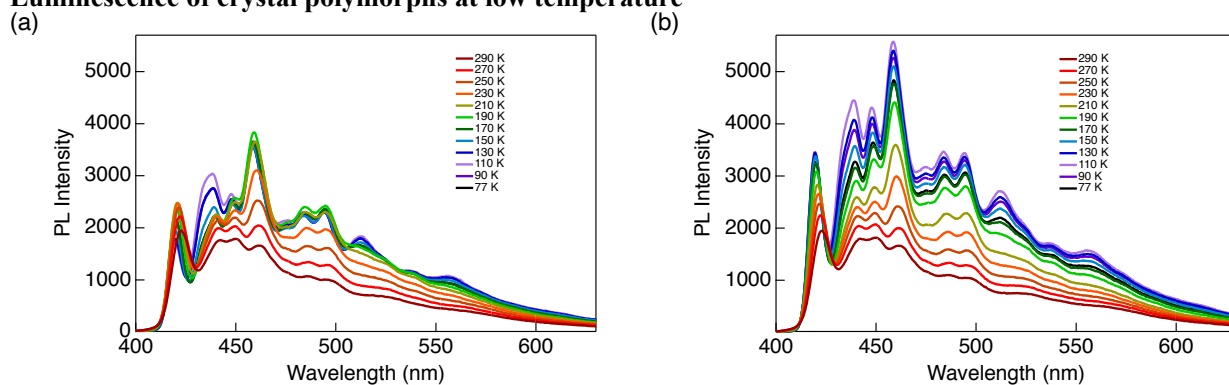

**Fig. S13** Temperature-dependent luminescence of CP-B crystals under excitation at (a) 320 nm and (b) 373 nm.

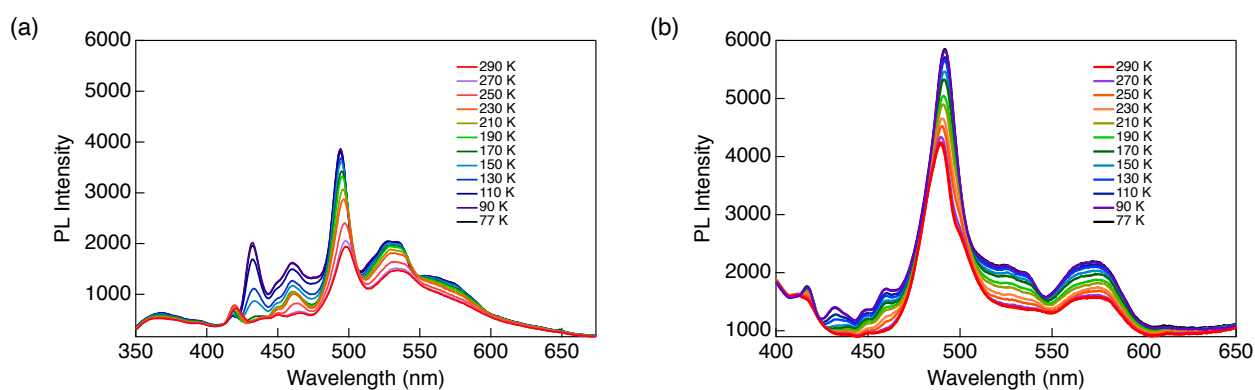

**Fig. S14** Temperature-dependent luminescence of CP-G crystals under excitation at (a) 320 nm and (b) 373 nm.

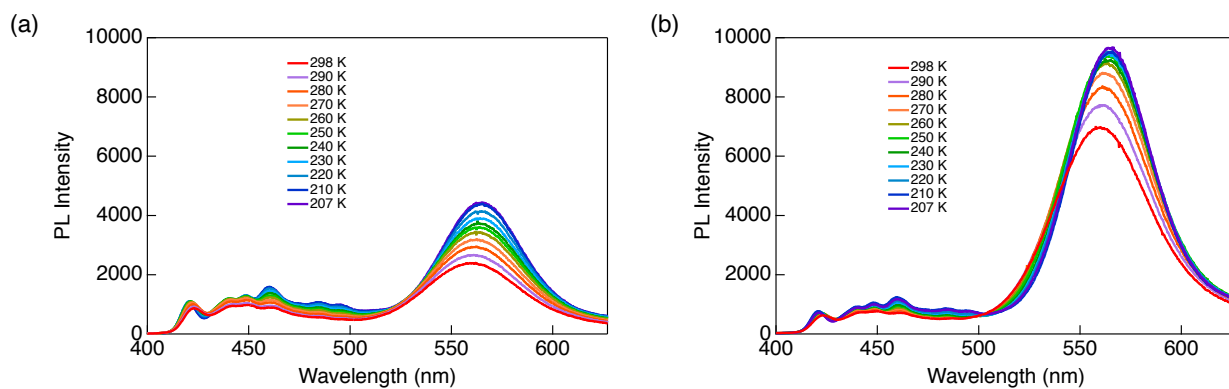

**Fig. S15** Temperature-dependent luminescence of CP-Y crystal under excitation at (a) 320 nm and (b) 373 nm.

## 5. PXRD analysis

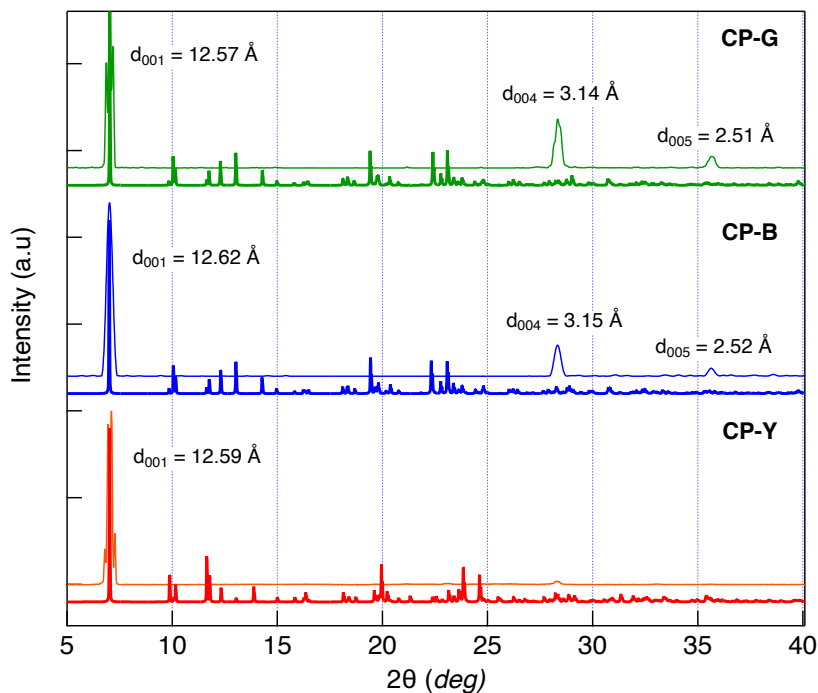

**Fig. S16** PXRD patterns of bulk crystals of **CP-G** and **CP-B** (thin lines) with corresponding simulated single crystal XRD pattern (bold lines). The PXRD peaks of bulk crystals were indexed using the single crystal data. The observed PXRD pattern of bulk crystals shows preferential molecular orientation, resulting in only three reflections ( $d_{001}$ ,  $d_{004}$ , and  $d_{005}$ ) being observable while other peaks become negligible.<sup>1</sup> This orientation amplifies the (001) reflections while removing the others. Additionally, the PXRD pattern of **CP-Y** bulk crystal is included for comparison.



## 6. TD-DFT Calculation

The molecular orbitals, transition energies, and oscillator strengths ( $f$ ) of the complexes were calculated using time-dependent density functional theory (TD-DFT). The TD-DFT calculations for the dimers suggested that electronic transitions from the ground state ( $S_0$ ) to the singlet excited state ( $S_n$ ) falling within the UV range, spanning between 266 and 319 nm, attribute to both LMCT and LMMCT transitions (Table S5, Fig. 6b, and Figs. S17–S18). The excitation energies of the triplet excited states were calculated from the same dimers, indicating that the  $S_0$ – $T_1$  transitions are located at 409 nm, 372 nm, and 412 nm for **CP-B**, **CP-G**, and **CP-Y**, respectively (Table S6). In case of the monomer, the  $S_0$ – $S_n$  transitions are located at 274 and 347 nm (Table S7), and this calculated result roughly aligns with the absorption spectra of the complex in dilute solution (Fig. 2). Furthermore, the calculations suggested that an intramolecular LMCT transition occurred in the monomer (Fig. S19).

**Table S5.** Transition, oscillator strengths ( $f$ ), and excitation wavelength ( $\lambda$ ) for  $S_0$ – $S_n$  excitation calculated for **CP-B**, **CP-G**, and **CP-Y** dimer.

|             | Transition                | $f$    | $\lambda$ (nm) |
|-------------|---------------------------|--------|----------------|
| <b>CP-B</b> | HOMO–1 $\rightarrow$ LUMO | 0.5492 | 318.88         |
|             | HOMO $\rightarrow$ LUMO+2 | 0.5001 | 281.78         |
| <b>CP-G</b> | HOMO–1 $\rightarrow$ LUMO | 0.9069 | 266.47         |
|             | HOMO $\rightarrow$ LUMO+2 | 0.3031 | 250.27         |
| <b>CP-Y</b> | HOMO–1 $\rightarrow$ LUMO | 0.5163 | 303.93         |
|             | HOMO $\rightarrow$ LUMO+2 | 0.4996 | 267.54         |

**Table S6.** Excitation wavelength ( $\lambda$ ) for the lowest  $S_0$ – $T_n$  transition calculated for **CP-B**, **CP-G**, and **CP-Y** dimer.

|             | $\lambda$ (nm) |
|-------------|----------------|
| <b>CP-B</b> | 408.93         |
| <b>CP-G</b> | 372.01         |
| <b>CP-Y</b> | 412.03         |

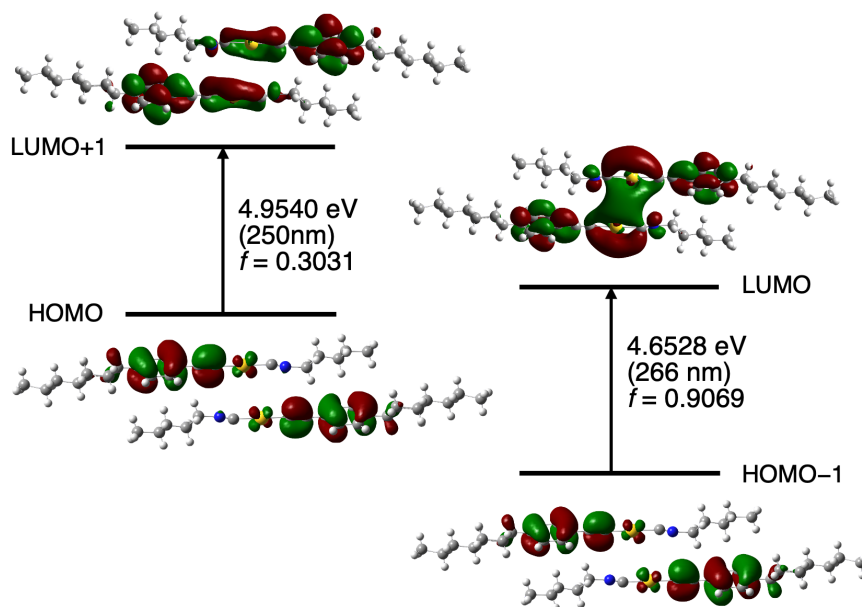

**Fig. S17** Molecular orbitals of **CP-G** dimer computed using DFT with B3LYP and 6–311+G(d,p), except Au atoms, for which SDD set was employed.

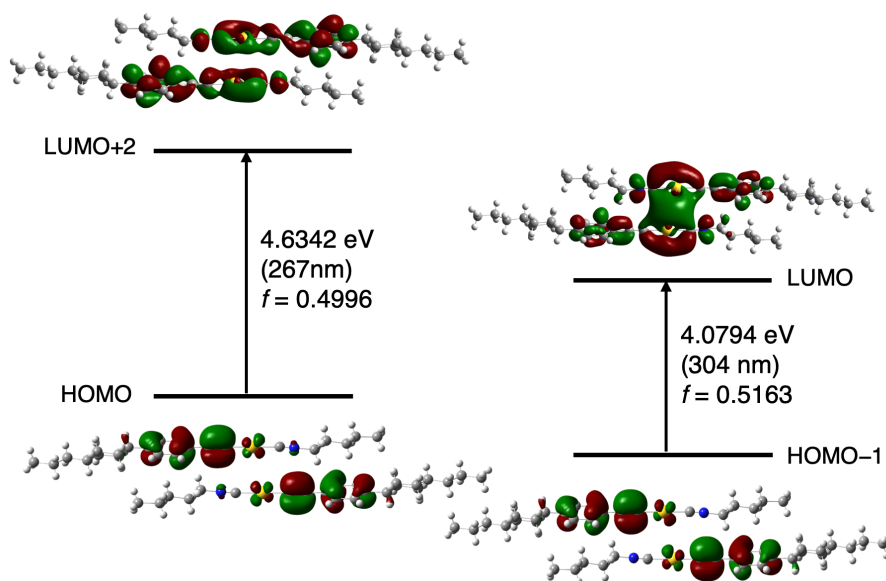

**Fig. S18** Molecular orbitals of CP-Y dimer computed using DFT with B3LYP and 6-311+G(d,p), except Au atoms, for which SDD set was employed.

**Table S7.** Transition, oscillator strengths ( $f$ ), and excitation wavelength ( $\lambda$ ) for  $S_0$ - $S_n$  excitation calculated for CP monomer.

|    | Transition                | $f$    | $\lambda$ (nm) |
|----|---------------------------|--------|----------------|
| CP | HOMO $\rightarrow$ LUMO   | 0.3843 | 347.36         |
|    | HOMO $\rightarrow$ LUMO+2 | 0.4278 | 273.93         |

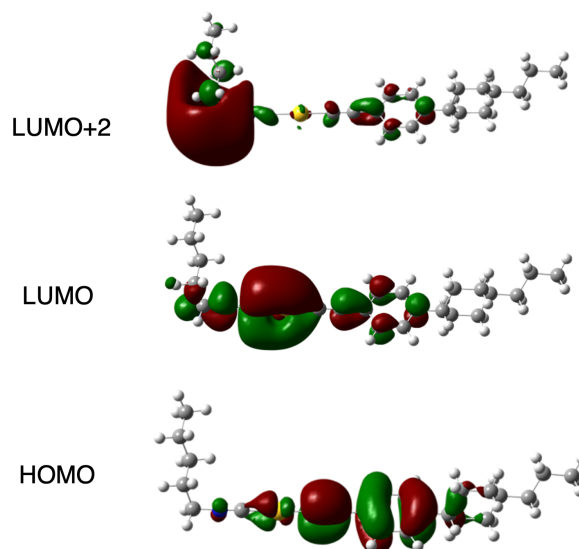

**Fig. S19** Molecular orbitals of CP monomer computed using DFT with B3LYP and 6-311+G(d,p), except Au atoms, for which SDD set was employed.

## 7. Mechanochromic luminescence

### Luminescence of ground sample

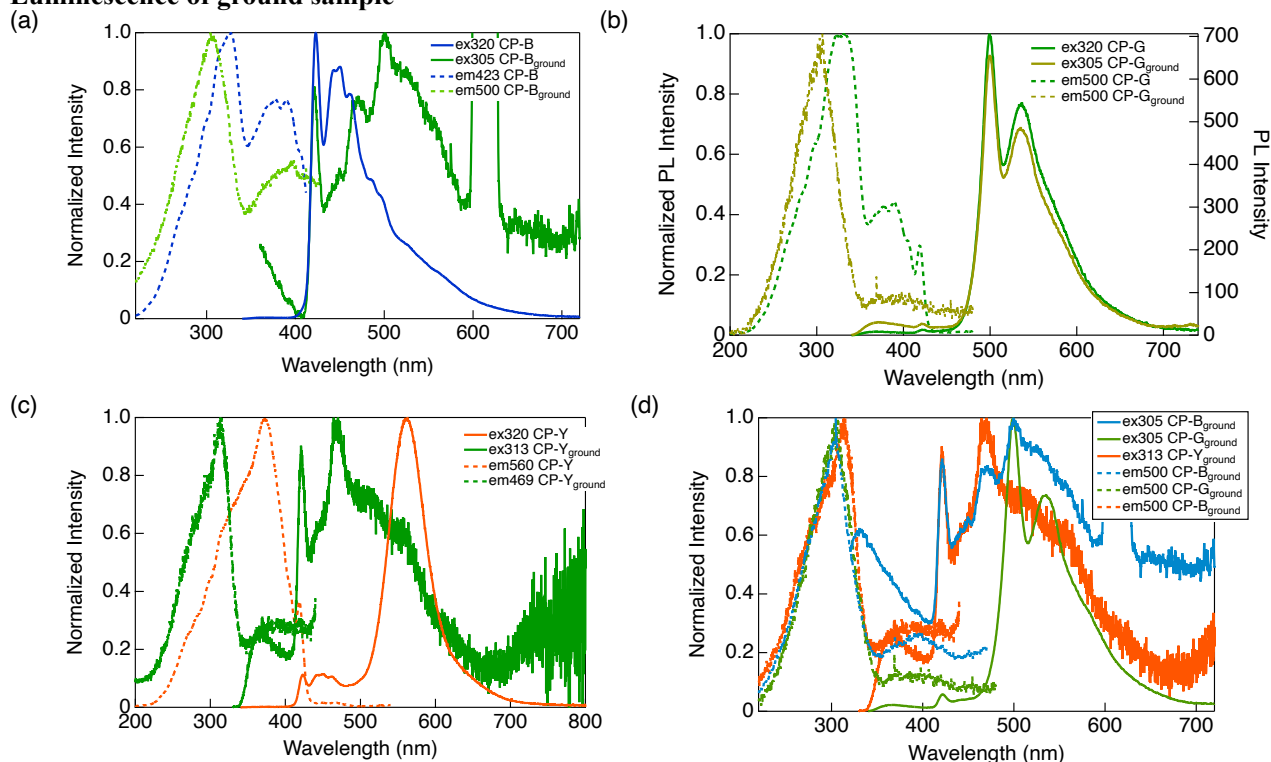

**Fig. S20** Emission and excitation spectra of (a) CP-B, (b) CP-G, and (c) CP-Y of bulk and ground crystals. (d) Overlay of ground crystal polymorphs for comparison.

### SEM images of ground CP crystals

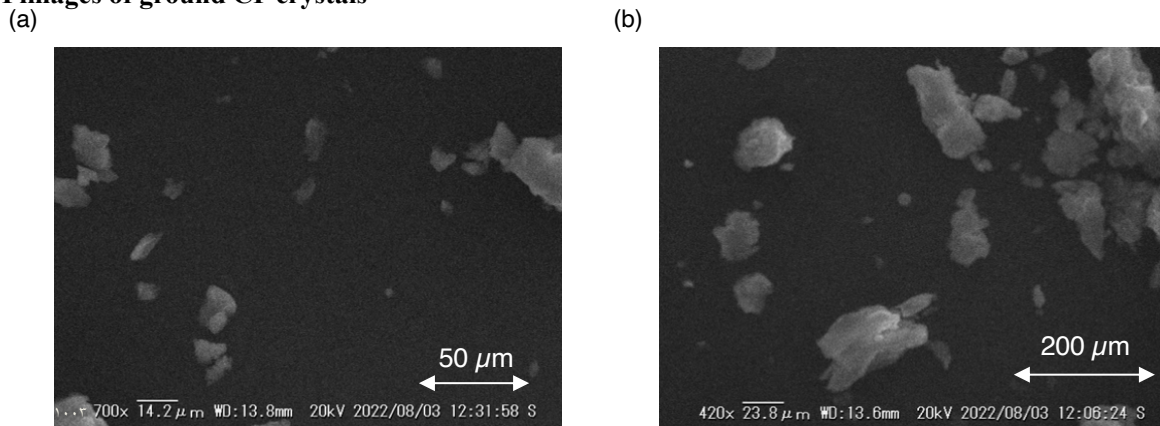

**Fig. S21** SEM images of CP-B and CP-G in ground crystals.

## 8. Luminescence in LC phase

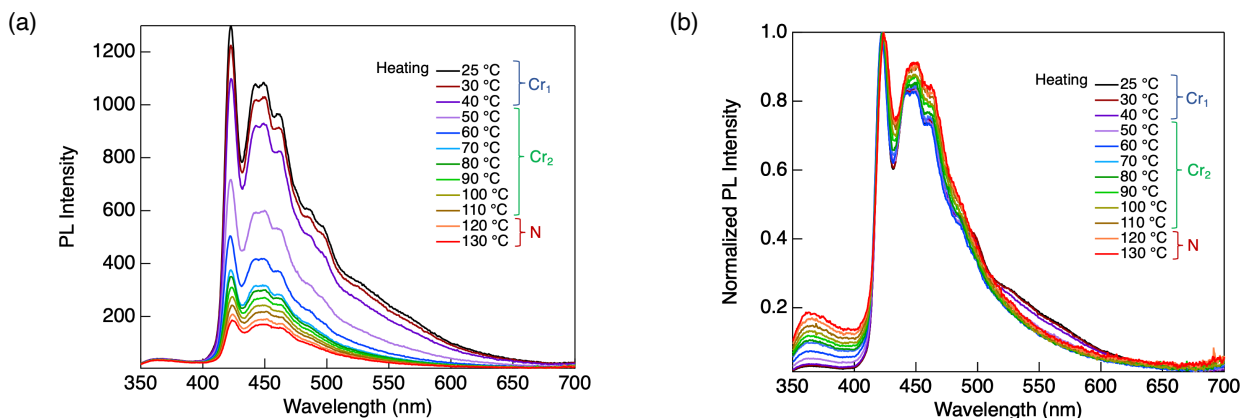

**Fig. S22** (a) Photoluminescence spectra of **CP-B** at various temperature during heating process and (b) the normalized spectra.  $\lambda_{ex} = 320$  nm.

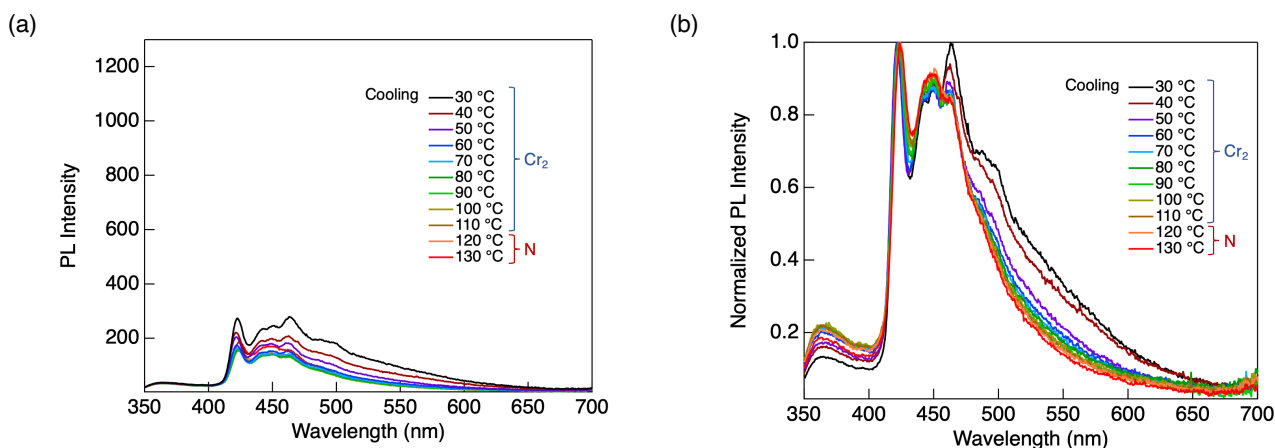

**Fig. S23** (a) Photoluminescence spectra of **CP-B** at various temperature during cooling process and (b) the normalized spectra.  $\lambda_{ex} = 320$  nm.

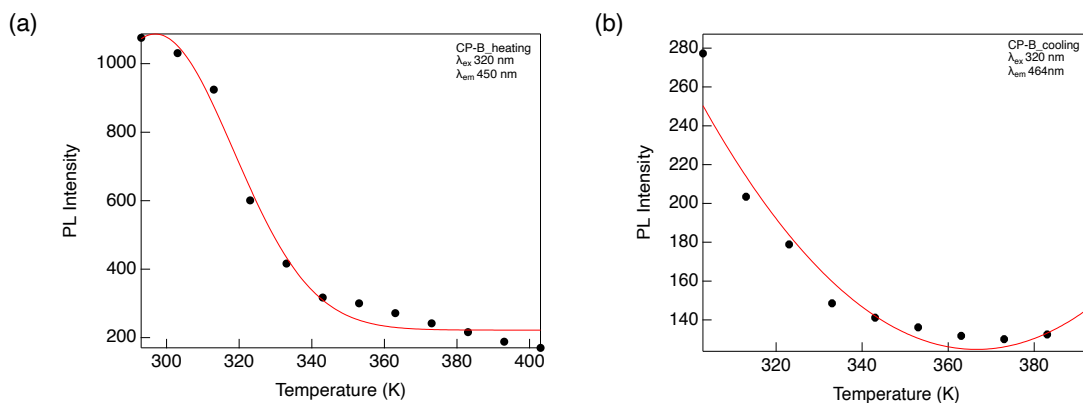

**Fig. S24** Temperature-dependent luminescence intensity for **CP-B** during (a) heating and (b) cooling processes.  $\lambda_{ex} = 320$  nm,  $\lambda_{em} = 450$  nm for heating and  $\lambda_{em} = 464$  nm for cooling.

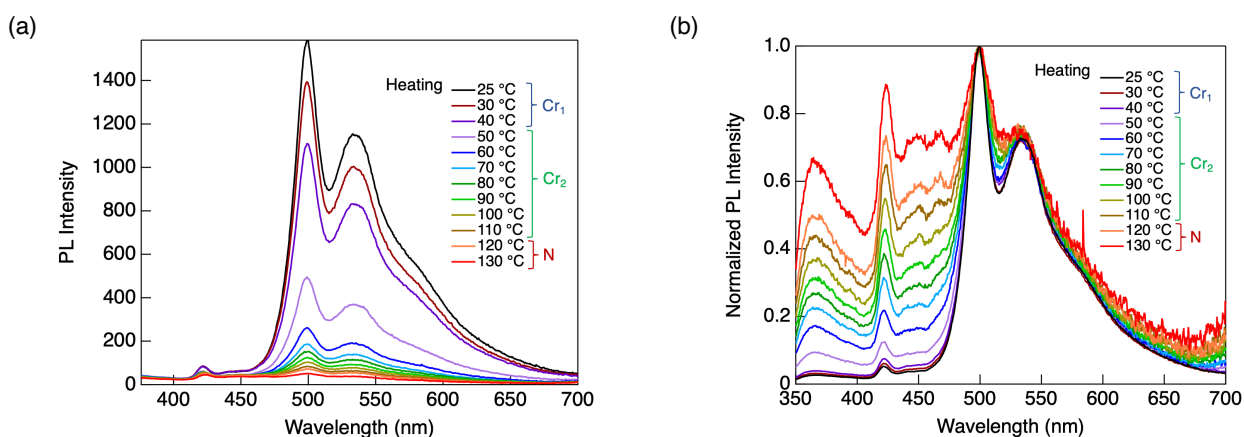

**Fig. S25** (a) Photoluminescence spectra of CP-G at various temperature during heating process and (b) the normalized spectra. ( $\lambda_{\text{ex}} = 320 \text{ nm}$ ).

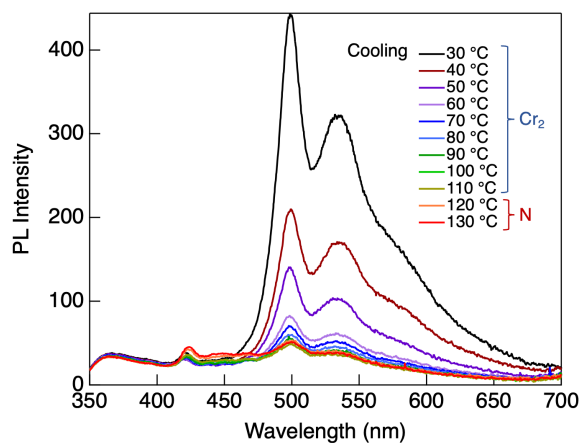

**Fig. S26** Photoluminescence spectra of CP-G at various temperature during cooling process ( $\lambda_{\text{ex}} = 320 \text{ nm}$ ).

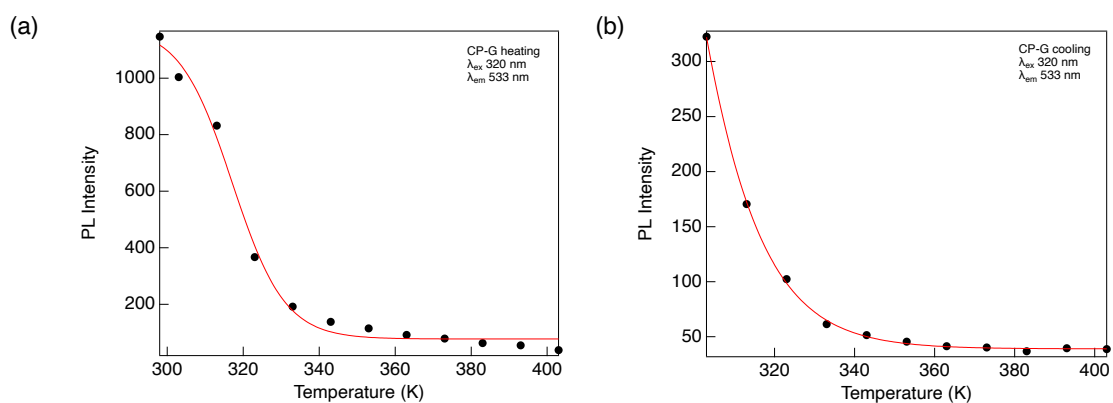

**Fig. S27** Temperature-dependent luminescence intensity for CP-G during (a) heating and (b) cooling processes.  $\lambda_{\text{ex}} = 320 \text{ nm}$ ,  $\lambda_{\text{em}} = 533 \text{ nm}$ .

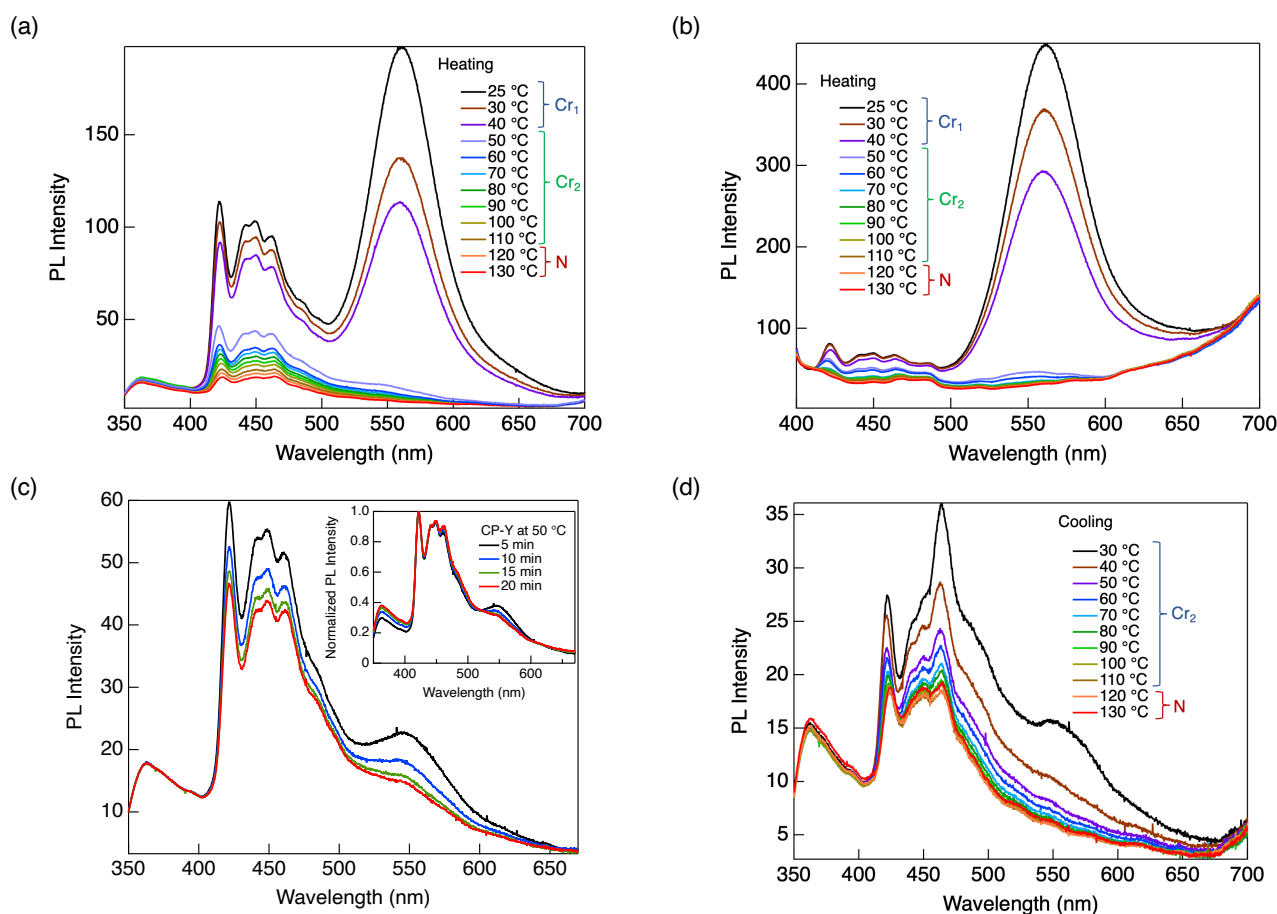

**Fig. S28** Photoluminescence spectra and the normalized spectra of CP-Y at various temperature during (a, b) heating, and (d) cooling processes under excitation at 320 nm for (a, d) and 370 nm for (b). (c) Photoluminescence spectra of CP-Y during heating process at 50 °C varying holding times under excitation at 320 nm, showing a decrease in relative emission intensity at 560 nm with prolonged holding time due to ongoing phase transition.

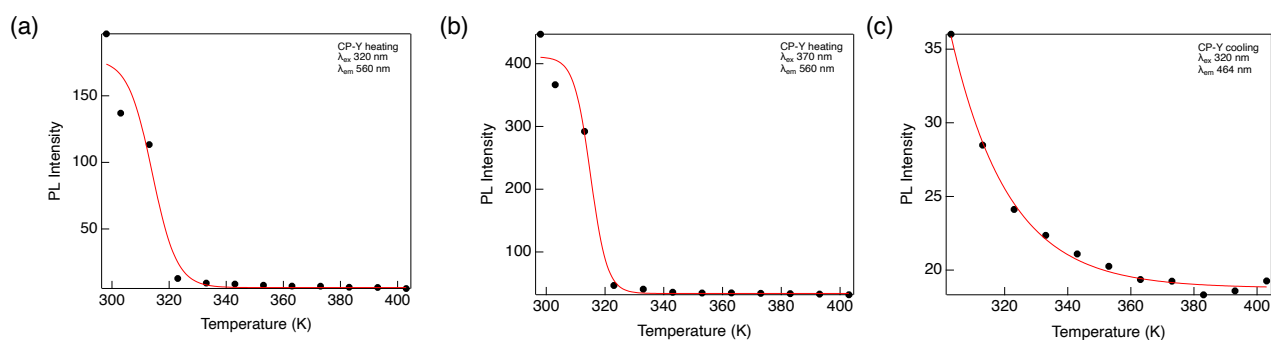

**Fig. S29** Temperature-dependent luminescence intensity for CP-Y during (a, b) heating and (c) cooling processes under excitation at 320 nm for (a, c) and 370 nm for (b).  $\lambda_{em}$  are 560 nm for heating and 464 nm for cooling.

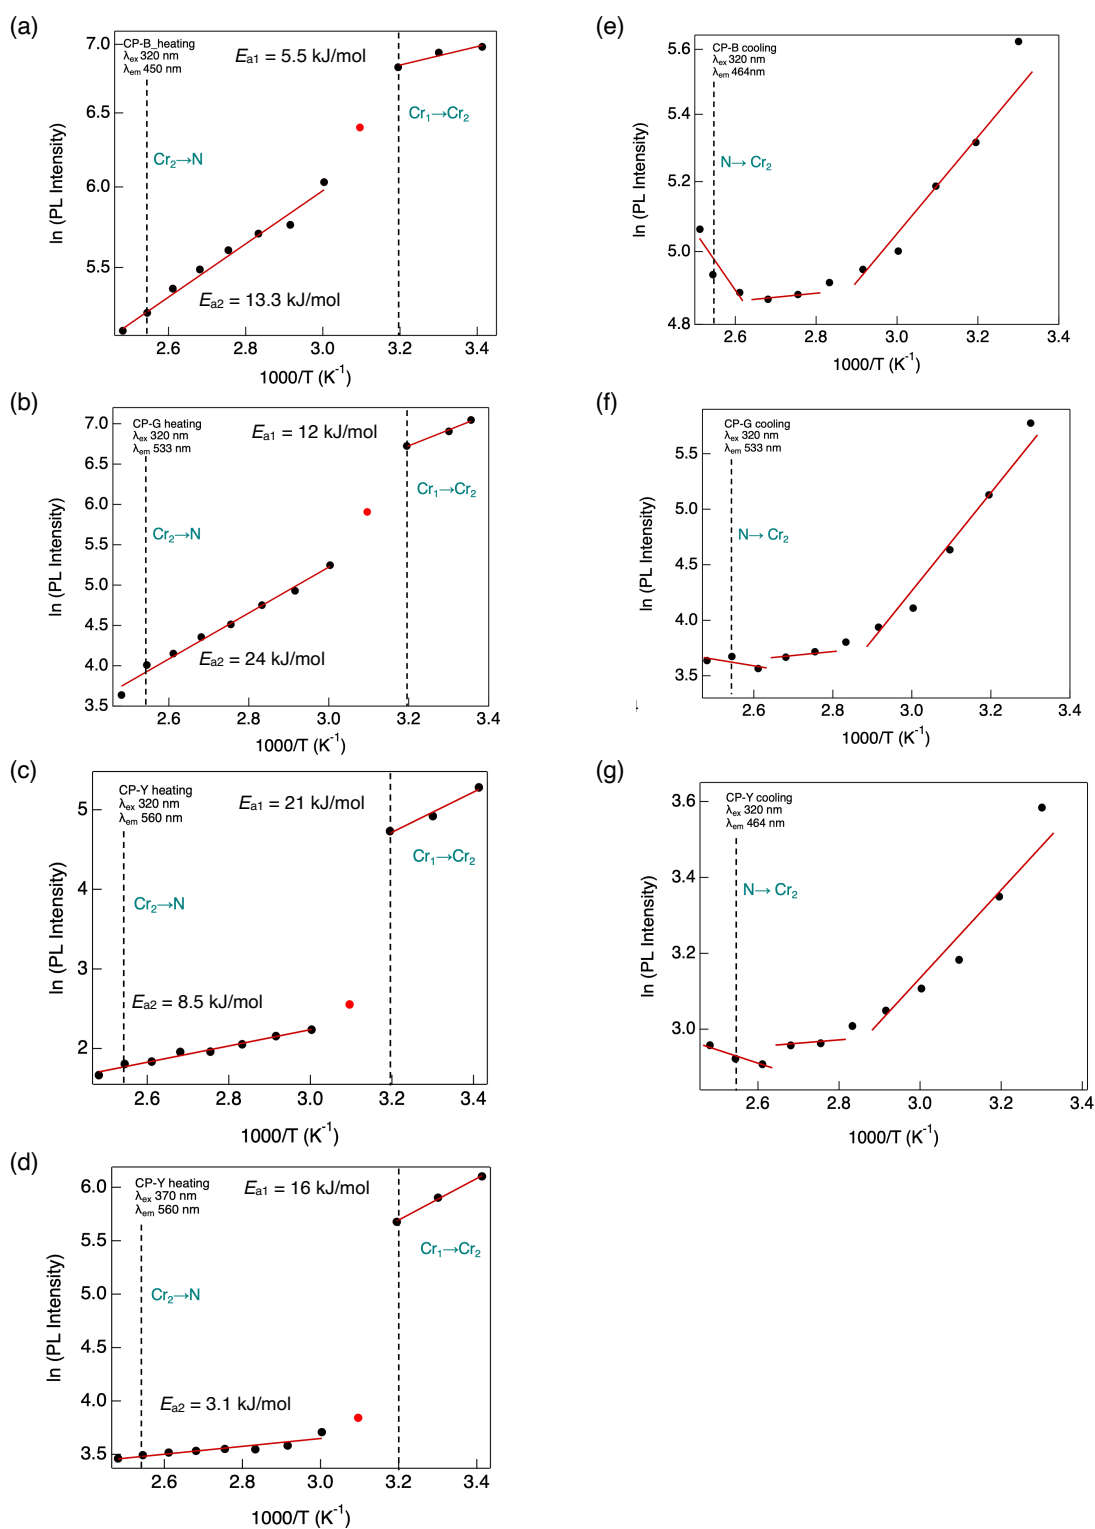

**Fig. S30** Arrhenius fit of luminescence intensity versus temperature for CP polymorphs during (a–d) heating and (e–g) cooling processes.  $\lambda_{ex} = 320$  nm for all measurements, except for (d), where 370 nm excitation was utilized. During heating,  $\lambda_{em}$  were set at 450 nm, 533 nm, and 560 nm for CP-B, CP-G, and CP-Y, respectively. For cooling,  $\lambda_{em}$  was 533 nm for CP-G and 464 nm for other CP polymorphs. Dashed line indicates the phase transition temperature. Red dot indicates omitted data from fitting due to high error value (see Fig. 28c, and explanation in the main text).

## References

- [1] J. Binns, C. Darmanin, C. M. Kewish, S. K. Pathirannahalge, P. Berntsen, P. L. R. Adams, S. Paporakis, D. Wells, F. G. Roque, B. Abbey, G. Bryant, C. E. Conn, S. T. Mudie, A. M. Hawley, T. M. Ryan, T. L. Greaves and A. V. Martin, *IUCrJ*, 2022, **9**, 231.
